# Supplementary material
Source: PubMed Central journal article supplement (PMC2741250)
Supplement: 0903704106_0903704106SI.pdf [file 0903704106_0903704106SI.pdf]

# Supporting Information

Kim et al. 10.1073/pnas.0903704106

## SI Text

**RT-PCR.** Total cellular RNA was purified from HeLa cells. The following primer sets were used for PCR (25 cycles); *OPN*, forward 5'-CGGGGTACCCCGATGGGCCGAGGTGATAGT-3' and reverse 5'-CCCAAGCTTGGGATTGACCTCAGAAGA-3'; *GAPDH*, forward 5'-GGTGAAGGTCGGAGTCAACG-3' and reverse 5'-TCACACCCATGACGAACATG-3'.

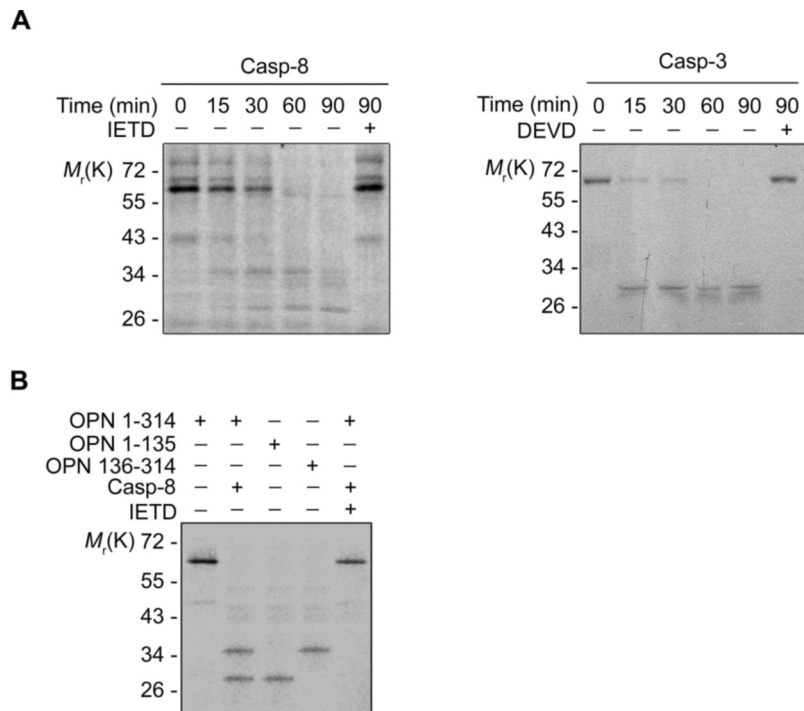

**Fig. S1.** Cleavage kinetics of OPN and mapping of cleavage site by caspases-8. (A) In vitro translated OPN was incubated with 10 ng of purified caspase-8 or -3 in the presence or absence of 25  $\mu$ M IETD-fmk (caspase-8) and DEVD-fmk (caspase-3) for the indicated times. The reaction mixtures were then visualized by autoradiography. (B) OPN is cleaved at Asp-135 by caspase-8. OPN 1-314, OPN 1-135, and OPN 136-314 were left untreated or incubated with 10 ng of purified caspase-8 for 60 min in the presence or absence of 25  $\mu$ M caspase inhibitor (IETD). Then, the reaction products were analyzed by autoradiography.

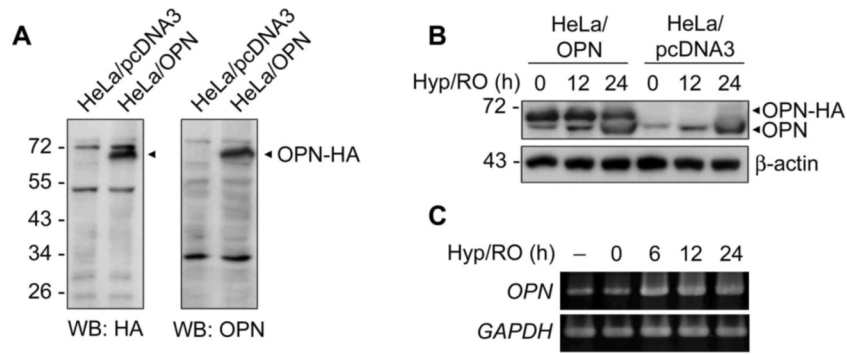

**Fig. S2.** Comparison of OPN induction during Hyp/RO. (A) HeLa cells stably expressing OPN-HA (HeLa/OPN) were generated and confirmed by Western blot analysis using both anti-HA and anti-OPN (LF123) antibodies. (B) Endogenous OPN is increased in a time-dependent manner during Hyp/RO. HeLa/pcDNA3 and HeLa/OPN cells were exposed to Hyp/RO for the indicated times. OPN level was detected using anti-OPN antibody.  $\beta$ -actin was used as an internal control. (C) OPN mRNA is increased during Hyp/RO. HeLa cells were exposed to Hyp/RO for the indicated times. Then, total RNAs were extracted and analyzed by RT-PCR.



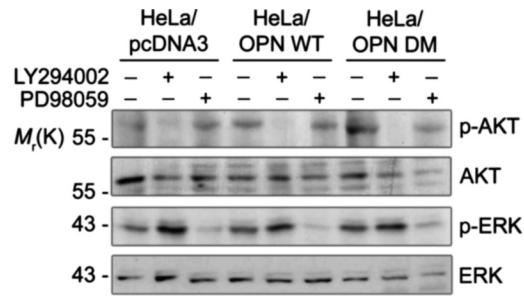

**Fig. S4.** Effects of LY294002 and PD98059 on the activation of AKT and ERK, respectively. HeLa/pcDNA3, HeLa/OPN WT, and HeLa/OPN DM cells were left untreated or exposed to Hyp (12 h)/RO (20 h) in the presence or absence of 40  $\mu$ M LY294002 or 40  $\mu$ M PD98059. Cell extracts were then prepared and examined with Western blot analysis using the indicated antibodies.



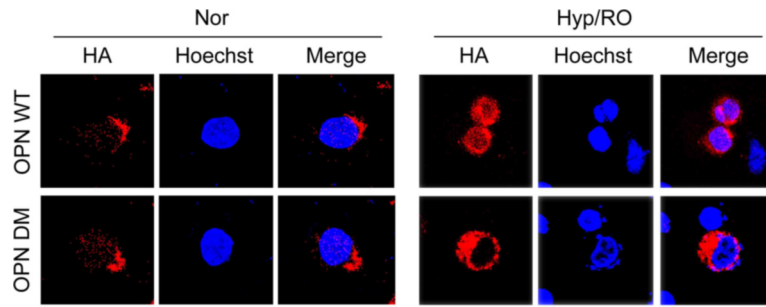

**Fig. S6.** Detection of OPN immunoreactivity in the nucleus during Hyp/RO. HeLa cells were transfected with OPN WT or OPN DM expression vector for 24 h and then left untreated (Nor) or exposed to Hyp (12 h)/RO (24 h). Cells were then immunostained using anti-HA antibody or Hoechst 33258 for the nucleus and then examined under a confocal microscope.
